# Supplementary material for: A monodispersed CuPt alloy: synthesis and its superior catalytic performance in the hydrogen evolution reaction over a full pH range
Source: Royal Society of Chemistry journal article supplement (doi:10.1039/d0ra09386f), 2021-01-01
Supplement: d0ra09386f1.pdf [file d0ra09386f1.pdf]

## Supporting Information

### Monodisperse CuPt alloy: Synthesis and their superior catalytic performance in hydrogen evolution reaction over the full pH range

Xinmei Liu,<sup>a\*,b</sup> Chen Liang,<sup>b</sup> Wenlong Yang,<sup>b</sup> Chunyang Yang,<sup>b</sup> Jiaqi Lin,<sup>2</sup> Xue Li<sup>b</sup>

a.Foshan (Southern China) Institute for New Materials, Foshan 528200, Guang- dong, People's Republic of China

b.School of Science, Harbin University of Science and Technology, 150080, People's Republic of China

Correspondence: liuxinmei.1990@163.com

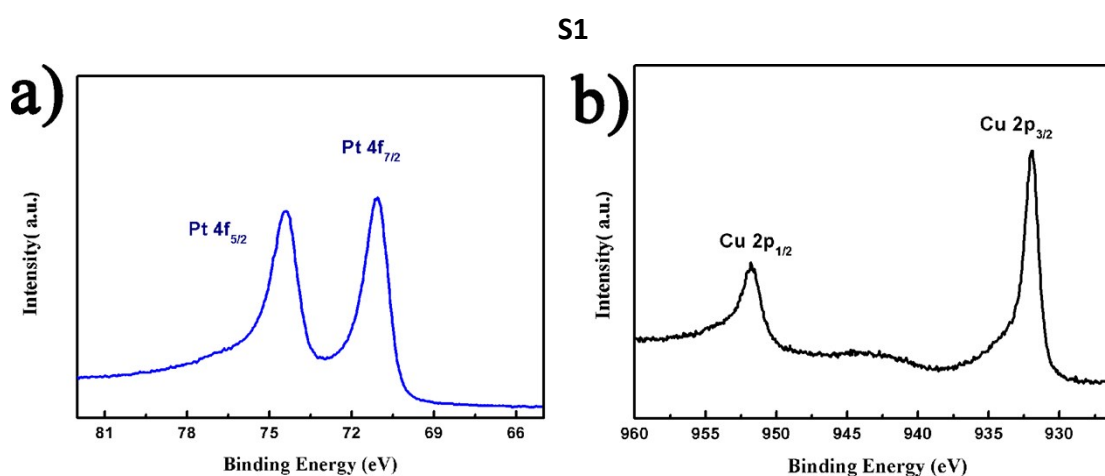

**Figure S1** The high-resolution for the Pt 4f and Cu 2p XPS spectra.

As shown the spectra Figure S1a, the peaks at 71.2 and 74.6 eV are corresponded to Pt 4f<sub>7/2</sub> and Pt 4f<sub>5/2</sub>, which demonstrate the upward shifts relative to pure Pt (71.0 and 74.4 eV).

Most importantly, the downshift of Pt induced by the lattice compression would reduce the binding energy to the reactive intermediates, thereby improving the HER performance.<sup>[1-2]</sup> As the Cu 2p XPS region in Figure S1b, the distinct peaks at 951.8 and 932.0 eV reveal that there is no oxide layer on the CuPt alloy surface. Owing to the strong interactions between Cu and Pt 2p<sub>3/2</sub> peak (932.0 eV) demonstrate a downshift alternative to pure Cu (932.8 eV). This result is agreed well with the HRTEM images in Figure 1d.

S2

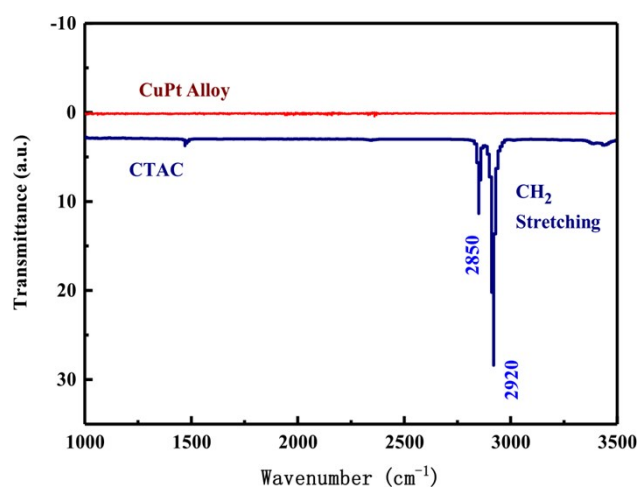

**Figure S2.** Fourier-transform infrared spectroscopy transmittance spectra for the CTAC and as-prepared CuPt alloy

S3

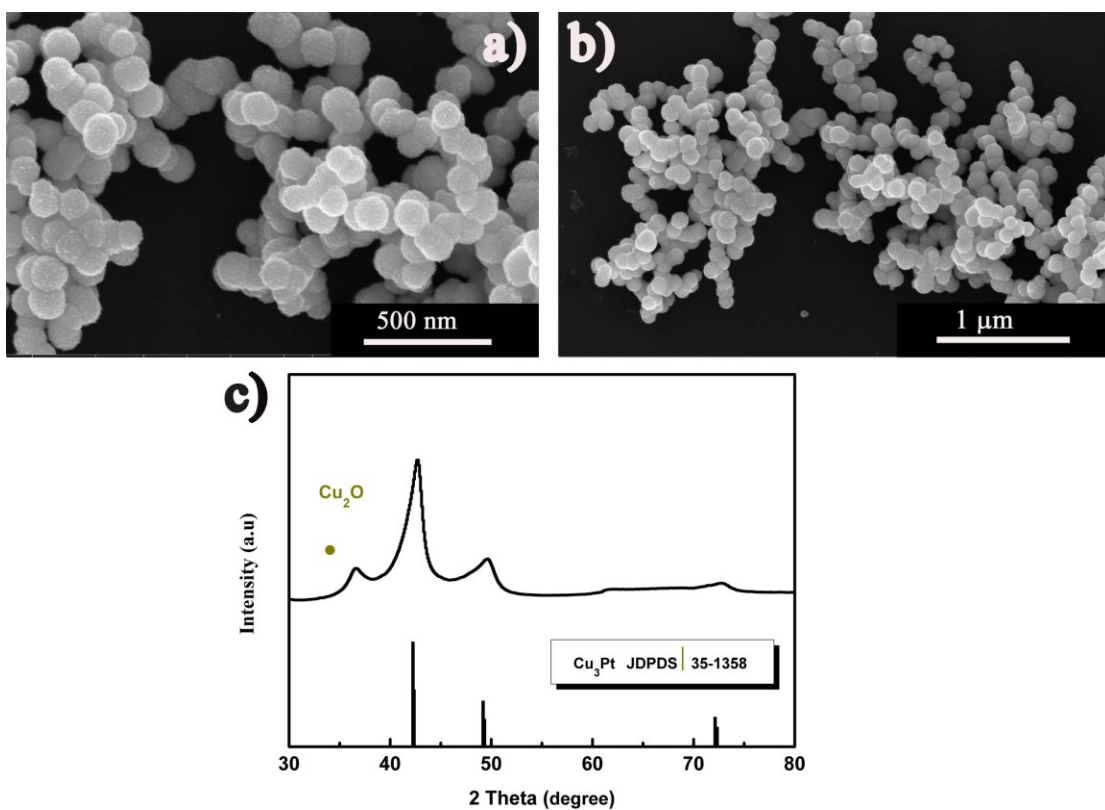

**Figure S3.** a-b)FESEM image;c) and XRD patterns for the sample as-prepared when no CTAC was employed.

**Synthesis of monodisperse Pt NPs**

Following a typical procedure, 1 mL of 10 mM  $\text{HPtCl}_4$  was dissolved in 15 mL  $\text{H}_2\text{O}$ . After the  $\text{CuCl}_2$  was dissolved, 1.0 g CTAC was added to this solution. The solution was magnetically stirred for 5 min. Subsequently, 5 mL of 1 M AA was added. The final solution was magnetically stirred for 20 min and maintained at 99 °C for 30 min. The final product was collected by a centrifugation and general washing technique.

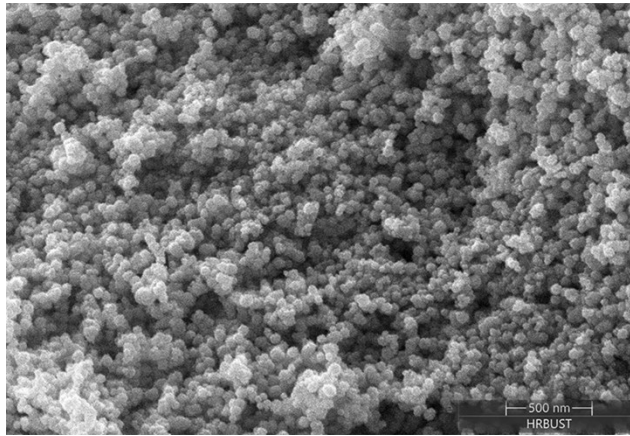

**Figure S4** FESEM of the Pt NPs in this work.

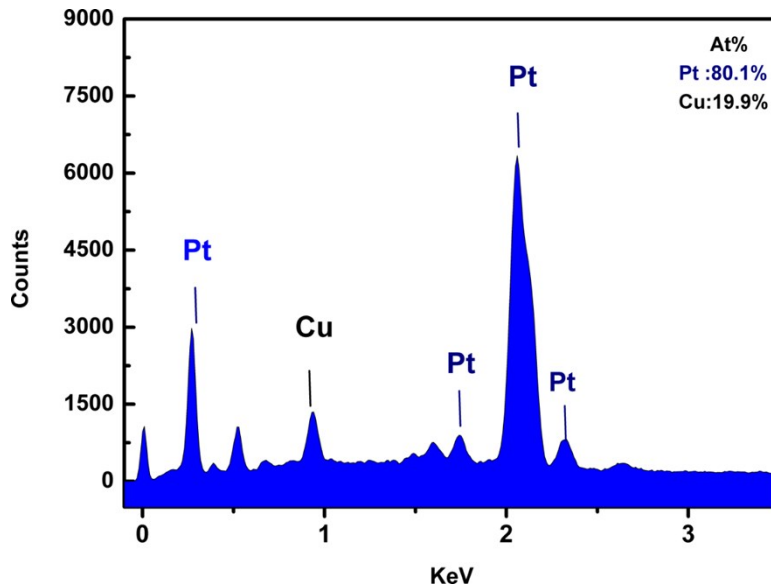

**Figure S5.** EDX for the CuPt alloy after the chronopotentiometric measurement.

## S6

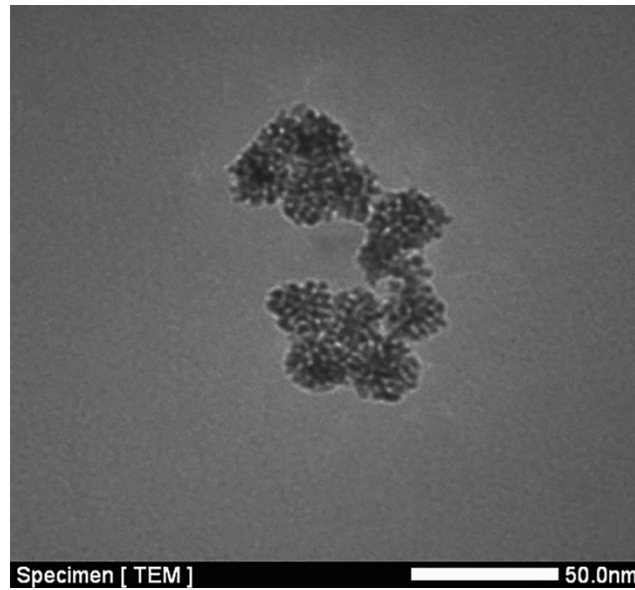

Figure S6. TEM for the CuPt alloy after the chronopotentiometric measurement in the acidic medias.

## S7

The TOF value is calculated from the equation<sup>[3-4]</sup>:

$$\text{TOF} = (J \times A) / (2 \times F \times n)$$

where J is the current density of at overpotential of 0.30 V , A is the area of the GCE (0.071 cm<sup>2</sup> in this work), F is the Faraday constant (with a value of 96485 C/ mol) ,and n is the mole number of the active metal sites of the catalyst that is deposited on the electrode. (which is  $8.76 \times 10^{-5}$  in work).The results are shown as Table S1.

**Table S1.** Catalytic parameters for CuPt alloy and Pt NPs in PBS solution.

|                                     | Pt NPs                | CuPt alloy            |
|-------------------------------------|-----------------------|-----------------------|
| TOF(/s)                             | $1.52 \times 10^{-2}$ | $5.30 \times 10^{-2}$ |
| Decline rate of overpotential(mV/s) | $1.09 \times 10^{-2}$ | $1.17 \times 10^{-4}$ |

All the results indicted that the performance of CuPt alloy was elevated after yielding  $1.2 \times 10^5$  s hydrogen in the alkaline media, which are agreed well with the chronopotentiometric curves.

### S8

**Table S2** Summary of TOF of CuPt alloy and Pt NPs under 1 M KOH solution.

|                  | Pt NPs                | CuPt alloy            |
|------------------|-----------------------|-----------------------|
| Initial TOF(/s)  | $1.16 \times 10^{-1}$ | $3.58 \times 10^{-2}$ |
| Terminal TOF(/s) | $9.20 \times 10^{-2}$ | $8.86 \times 10^{-2}$ |

As show the Table S2, the catalytic parameters for CuPt alloy are much superior to Pt NPs. It revealed that preferable d-band structure would endow the CuPt alloy an enhanced activity.

### S9

**Table S3.**Catalytic parameters for commercial Pt/C and Pt NPs.

| Electrolyte                         | 0.05 M H <sub>2</sub> SO <sub>4</sub> | PBS                   | 1M KOH                | Electrocatalyst |
|-------------------------------------|---------------------------------------|-----------------------|-----------------------|-----------------|
| Overpotential (mV)                  | 86                                    | 299                   | 134 mV                | Pt/C            |
|                                     | 61                                    | 282                   | 128 mV                | Pt NPs.         |
| Decline rate of overpotential(mV/s) | $7.05 \times 10^{-3}$                 | $3.88 \times 10^{-2}$ | $2.90 \times 10^{-2}$ | Pt/C            |
|                                     | $5.33 \times 10^{-5}$                 | $1.09 \times 10^{-2}$ | $7.48 \times 10^{-4}$ | Pt NPs.         |

As shown in the Table S3, all parameters indicate that the pure Pt NPs show a superior durability and low overpotential. This contrast can be attributed to the high mass ratio of Pt and small diameter for the Pt NPs.

### S10

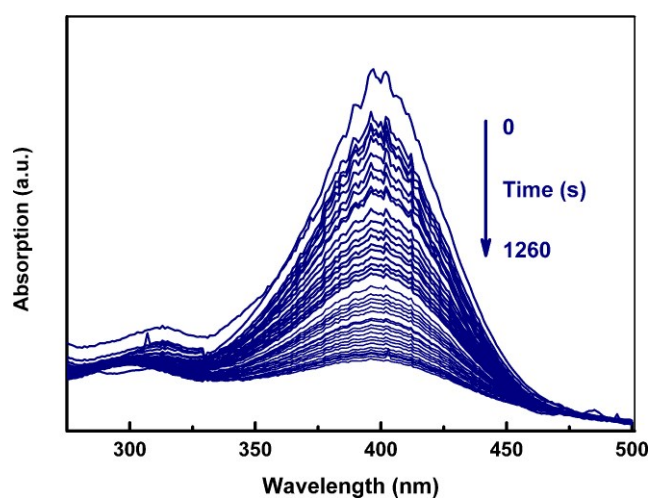

**Figure S7.** The plot of  $\ln(C/C_0)$  versus time for the reduction of 4-NP that catalyzed by the pure Pt NPs.

## Notes and references

- [1].Zhang, X.-F., A.-J. Wang, L. Zhang, J. Yuan, Z. Li and J.-J. Feng (2018). "Solvothermal Synthesis of Monodisperse PtCu Dodecahedral Nanoframes with Enhanced Catalytic Activity and Durability for Hydrogen Evolution Reaction." *ACS Applied Energy Materials* 1(9): 5054-5061.
- [2].Cao, L., G. Zhang, W. Lu, X. Qin, Z. Shao and B. Yi (2016). "Preparation of hollow PtCu nanoparticles as high-performance electrocatalysts for oxygen reduction reaction in the absence of a surfactant." *RSC Advances* 6(46): 39993-40001.
- [3] Ni, Y., L. Yao, Y. Wang, B. Liu, M. Cao and C. Hu (2017). "Construction of hierarchically porous graphitized carbon-supported NiFe layered double hydroxides with a core–shell structure as an enhanced electrocatalyst for the oxygen evolution reaction." *Nanoscale* 9(32): 11596-11604.
- [4] Jin, H., H. Zhang, J. Chen, S. Mao, Z. Jiang and Y. Wang (2018). "A general synthetic approach for hexagonal phase tungsten nitride composites and their application in the hydrogen evolution reaction." *Journal of Materials Chemistry A* 6(23): 10967-10975.
